# Supplementary material
Source: publisher site journal article supplement (https://www.dovepress.com/article/240642)
Supplement: Supplementary file 1 [file get_supplementary_file.php]

## Supplementary materials

### Supplementary figure.1

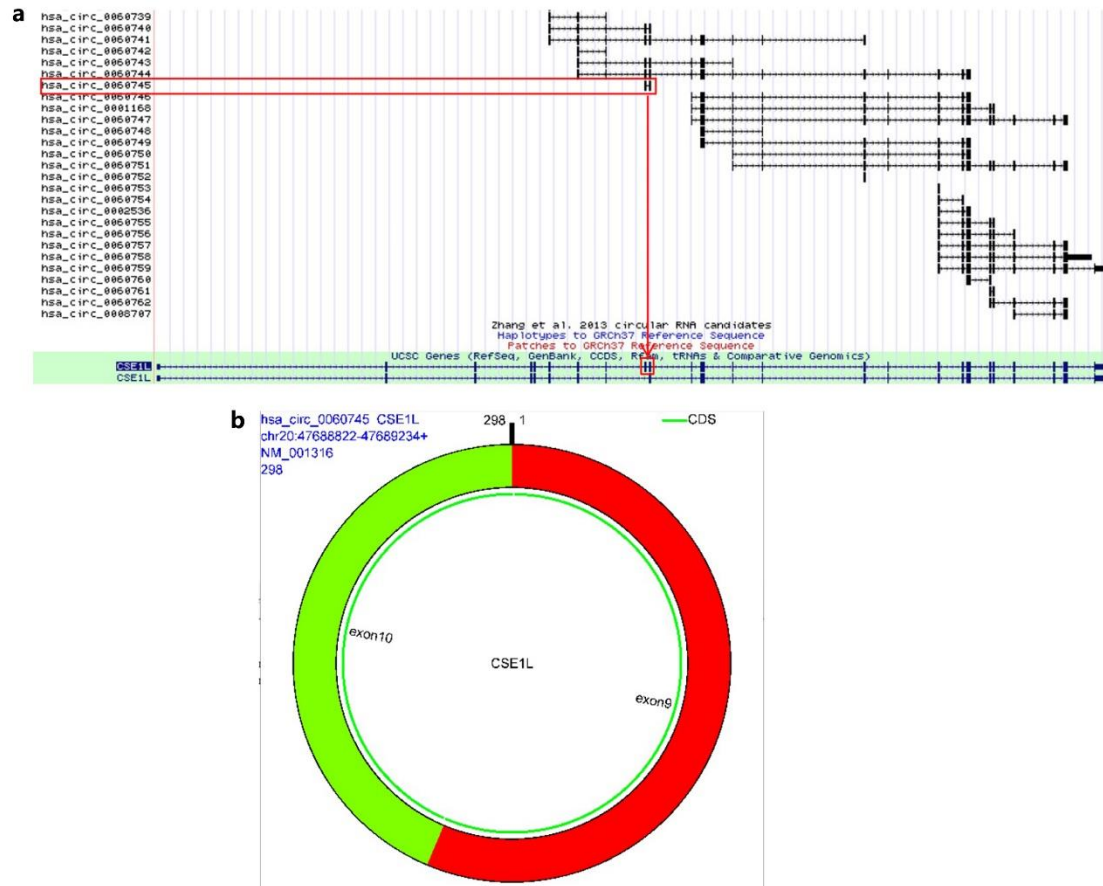

### Supplementary figure 1

(a-b) Circ\_0060745 was derived from exon 9 to exon 10 of linear CSE1L (spliced mature full length is 412 bp), as determined on UCSC (a) (<http://genome.ucsc.edu/>) and by a software circPrimer (version 1.2) (b).

## Supplementary figure 2

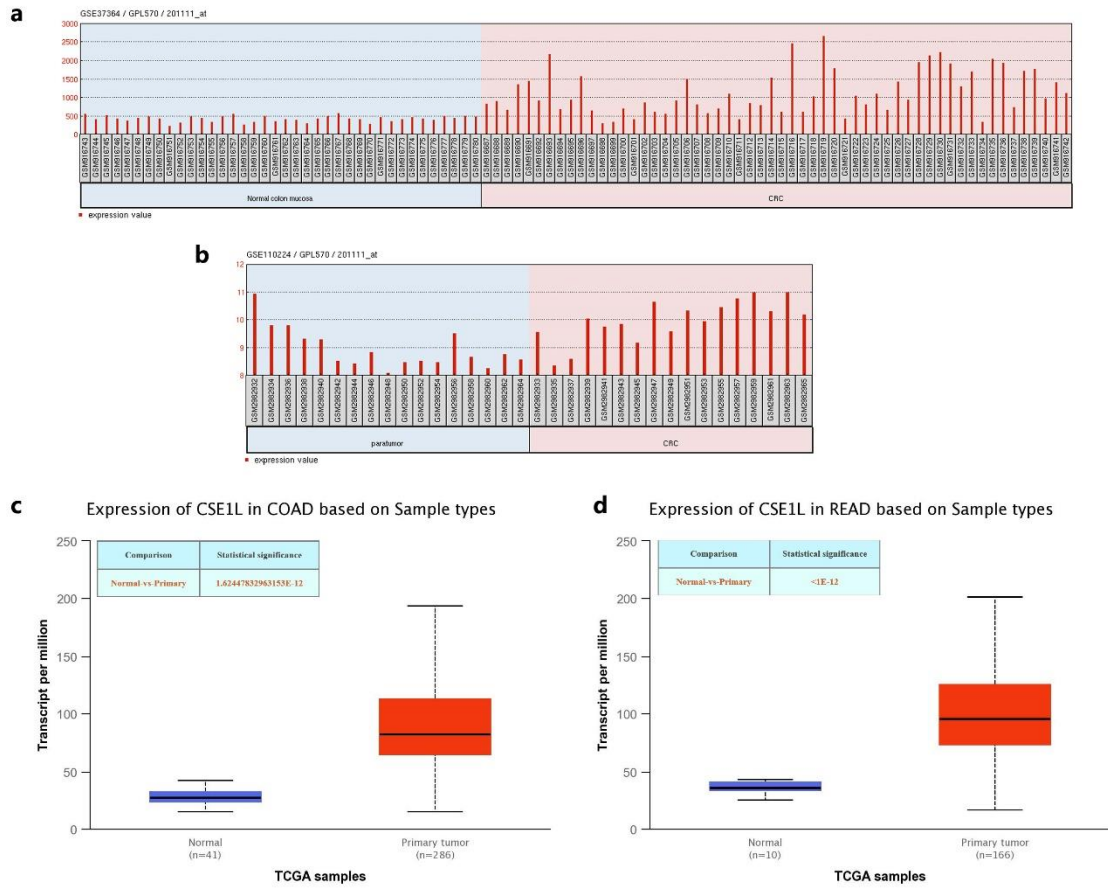

## Supplementary figure 2

(a-b) Expression of CSE1L in GEO datasets GSE37364 (a) and GSE110224 (b) was determined by an online software GEO2R. Probe ID 201111\_at represents for CSE1L. (c) Expression of CSE1L in 286 cases of colon adenocarcinoma was higher than that of 41 case of normal colon tissues. (d) Expression of CSE1L in 166 cases of rectal adenocarcinoma was higher than that of 10 case of normal rectal tissues.
